# Supplementary material for: School Fees Payment Accounting Management System
Source: Royal Society of Chemistry journal article supplement (doi:10.1039/c2pp00005a), 2012-05-01
Supplement: c2pp00005a.pdf [file c2pp00005a.pdf]

# Chemical Reaction Networks as a model to describe UVC- and radiolytically-induced reactions of simple compounds

## SUPPLEMENTARY INFORMATION

Daniele Dondi,<sup>a</sup> \* Daniele Merli,<sup>a</sup> Angelo Albini,<sup>b</sup> Alberto Zeffiro<sup>a</sup> and Nick Serpone<sup>1, b</sup>

<sup>a</sup> Dipartimento di Chimica, Università di Pavia, via Taramelli 12, Pavia 27100, Italia

<sup>b</sup> Gruppo Fotochimico, Dipartimento di Chimica, Università di Pavia, via Taramelli 12, Pavia 27100, Italia

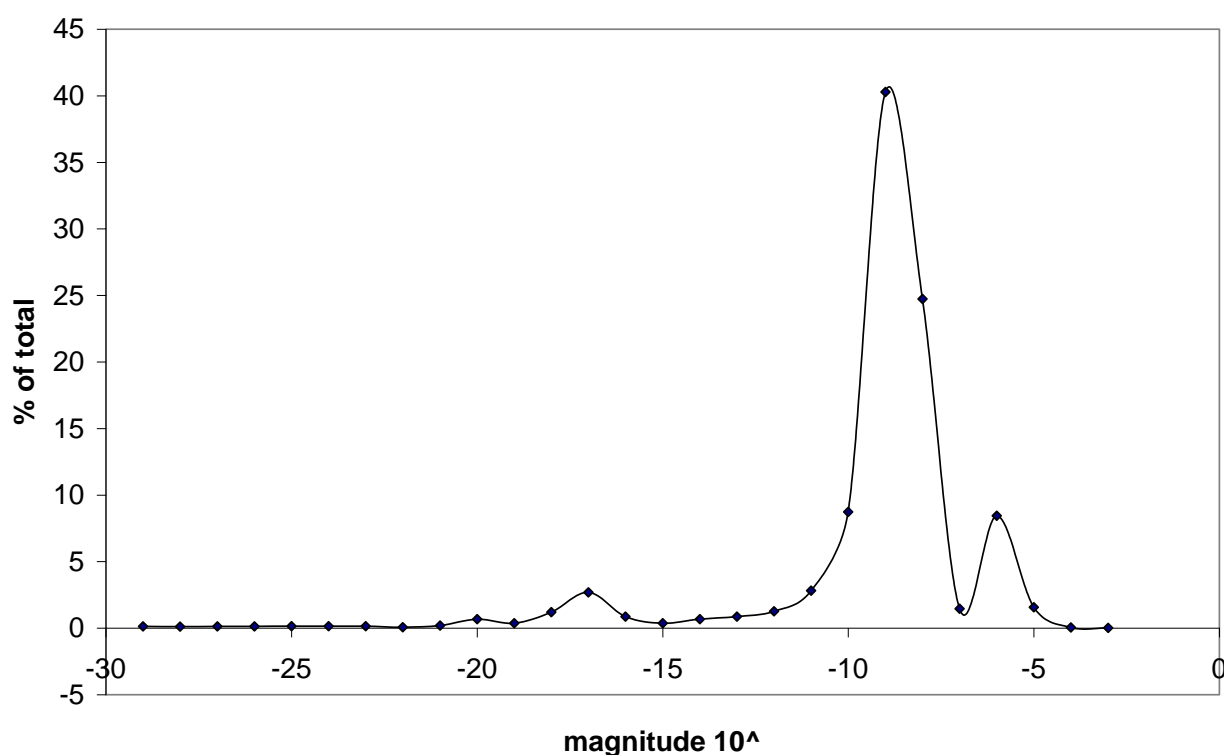

**Figure S1.** - Distribution of kinetic constants taken for the UMIST database. Source: J. Woodall, M. Agúndez, A. J. Markwick-Kemper, and T. J. Millar *A&A*, **2007**, *466*, 1197–1204.

<sup>1</sup> Professor Emeritus, Concordia University, Montreal, Canada, and Visiting Professor, University of Pavia, Italy.

\* Corresponding author: Tel.: (+39) 0382 98 73 44 ; Fax: (+39) 0382 98 73 23 ; e-mail: [daniele.dondi@unipv.it](mailto:daniele.dondi@unipv.it)

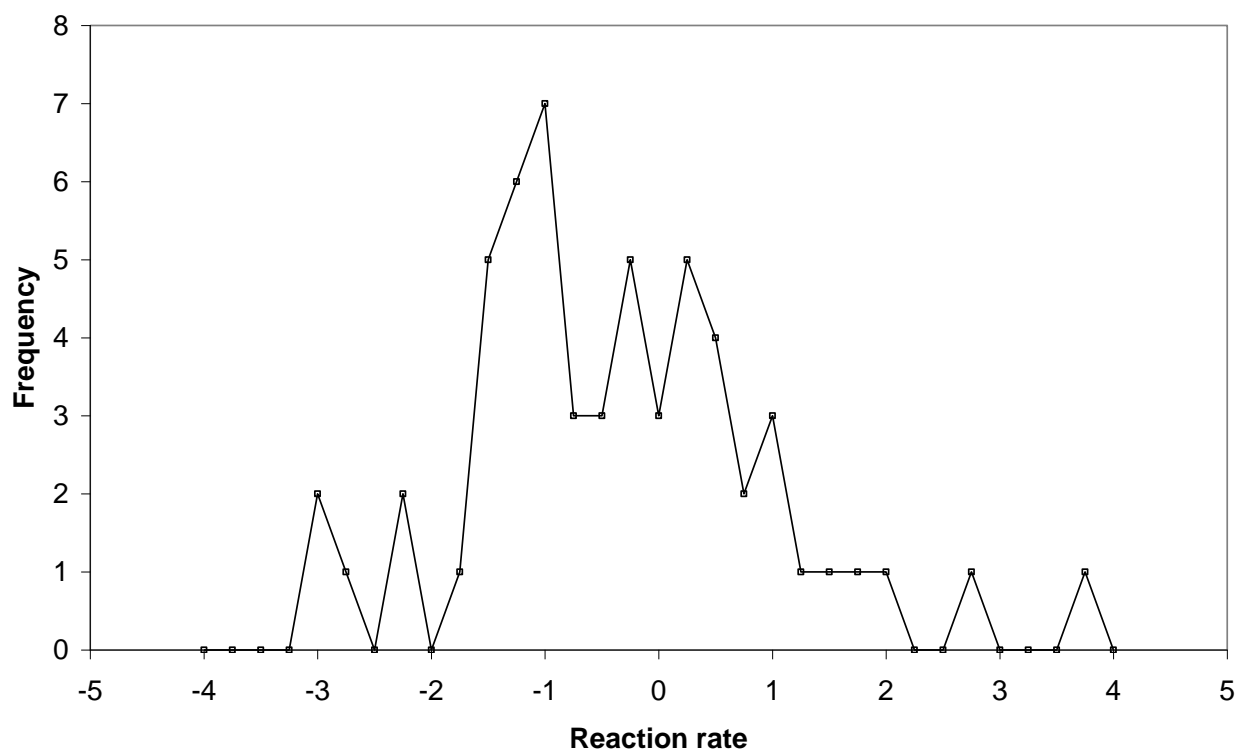

**Figure S2.** - Distribution of kinetic constants taken from the *Catharanthus roseus* Database.  
Source: M. Leduc, C. Tikhomiroff, M. Cloutier, M. Perrier and M. Jolicoeur *Bioprocess Biosyst Eng.* **2006**, 28, 295–313.
